# Supplementary material for: Validation of High-Sensitivity Severe Acute Respiratory Syndrome Coronavirus 2 Testing for Stool—Toward the New Normal for Fecal Microbiota Transplantation
Source: PubMed Central journal article supplement — Clin Transl Gastroenterol. 2021 Jun 9;12(6):e00363. doi: 10.14309/ctg.0000000000000363 (PMC8189625; doi:10.14309/ctg.0000000000000363), 2021-06-09
Supplement: ct9-12-e00363-s001.pdf [file ct9-12-e00363-s001.pdf]

**Supplementary Material: Validation of High-Sensitivity SARS-CoV-2 Testing for Stool -  
Towards The New Normal for Fecal Microbiota Transplantation**

### *SARS-CoV-2 RT-PCR Validation Study*

This assay was previously validated on respiratory (upper and lower) and serum samples. Respiratory sample validation was performed by testing 20 contrived positive clinical samples (5 positive each for nasopharyngeal (NP), bronchoalveolar (BAL), sputum and serum), created by spiking a known concentration of a synthetic SARS-CoV-2 plasmid (Integrated DNA Technologies (IDT), Coralville, IA) at approximately two times the assay limit of detection (LoD) and 20 contrived non-reactive samples (5 negative each for NP, BAL, sputum and serum), as well as 18 person under investigation split clinical specimens (10 oropharyngeal, 7 NP, and 1 BAL) results of which were confirmed by a secondary clinical laboratory with 100% concordance. Next a preliminary LoD was determined by testing 10-fold serial dilutions of quantitated IDT SARS-CoV-2 plasmid material. A confirmation of the LoD was determined by testing 20 extracted replicates. The LoD was determined as the lowest concentration where  $\geq 95\%$  (19/20) of the replicates were positive, which was 10 copies/ul. We performed cross reactivity testing for MERS-COV, SARS-COV, Human coronavirus HKU1, Rhinovirus, Human metapneumovirus, RSV-A, and RSV-B. Only SARS-COV cross reacted with the N3 primer (which is no longer used in our assay) <sup>1</sup>. No other cross reactivity was observed. This in addition to extensive specificity/exclusivity testing performed by the CDC for the primer and probe sets used <sup>2,3</sup>.

**Supplementary Table 1: Nasopharyngeal Stool RT-PCR Agreement (n=31)**

|                         |          | <b>Nasopharyngeal RT-PCR</b> |          |       |
|-------------------------|----------|------------------------------|----------|-------|
|                         |          | Positive                     | Negative | Total |
| <b>Stool<br/>RT-PCR</b> | Positive | 16                           | 0        | 16    |
|                         | Negative | 1                            | 14       | 15    |
|                         | Total    | 17                           | 14       | 31    |

Abbreviations: RT-PCR: reverse transcriptase polymerase chain reaction

**Supplementary Table 2. NP RT-PCR positive patients**

| Patient ID | SARS-CoV-2 NP swab result | SARS-CoV-2 RT-PCR stool result | Day from symptom onset to NP testing | Day from symptom onset to stool testing | NP C <sub>T</sub> value | Stool C <sub>T</sub> value | SARS-CoV-2 serology testing result |
|------------|---------------------------|--------------------------------|--------------------------------------|-----------------------------------------|-------------------------|----------------------------|------------------------------------|
| Patient 01 | Positive                  | Positive                       | 7                                    | 9                                       | 24.9                    | 35.7                       | N/A                                |
| Patient 02 | Positive                  | Positive                       | 0                                    | 3                                       | 18.1                    | 30.0                       | N/A                                |
| Patient 03 | Positive                  | Positive                       | 2                                    | 5                                       | 19.3                    | 25.0                       | N/A                                |
| Patient 04 | Positive                  | Positive                       | 7                                    | 9                                       | 33.4                    | 33.5                       | N/A                                |
| Patient 05 | Positive                  | Positive                       | 9                                    | 12                                      | 33.2                    | 35.0                       | N/A                                |
| Patient 06 | Positive                  | Positive                       | 3                                    | 14                                      | 23.6                    | 37.1                       | N/A                                |
| Patient 07 | Positive                  | Positive                       | 7                                    | 12                                      | 22.4                    | 38.7                       | N/A                                |
| Patient 08 | Positive                  | Positive                       | 7                                    | 11                                      | 28.8                    | 30.0                       | N/A                                |
| Patient 09 | Positive                  | Positive                       | 9                                    | 13                                      | 28.4                    | 39.2                       | N/A                                |
| Patient 10 | Positive                  | Positive                       | 19                                   | 9                                       | 17.5                    | 34.7                       | N/A                                |
| Patient 11 | Positive                  | Positive                       | 5                                    | 12                                      | 18.9                    | 30.5                       | N/A                                |
| Patient 12 | Positive                  | Positive                       | 7                                    | 11                                      | 31.0                    | 40.0                       | N/A                                |
| Patient 13 | Positive                  | Negative                       | 2                                    | 6                                       | 21.7                    | N/A                        | Indeterminate (day 3)              |
| Patient 14 | Positive                  | Positive                       | 43                                   | 29                                      | 29.1                    | 26.2                       | N/A                                |
| Patient 15 | Positive                  | Positive                       | 1                                    | 13                                      | 17.1                    | 36.8                       | Positive (day 23)                  |
| Patient 16 | Positive                  | Positive                       | 1                                    | 9                                       | 29.1                    | 34.8                       | N/A                                |
| Patient 17 | Positive                  | Positive                       | 0                                    | 2                                       | 25.1                    | 36.8                       | N/A                                |

Abbreviations: C<sub>T</sub>: cycle threshold, NP: nasopharyngeal, RT-PCR: reverse transcriptase polymerase chain reaction

### Supplementary Figure 1

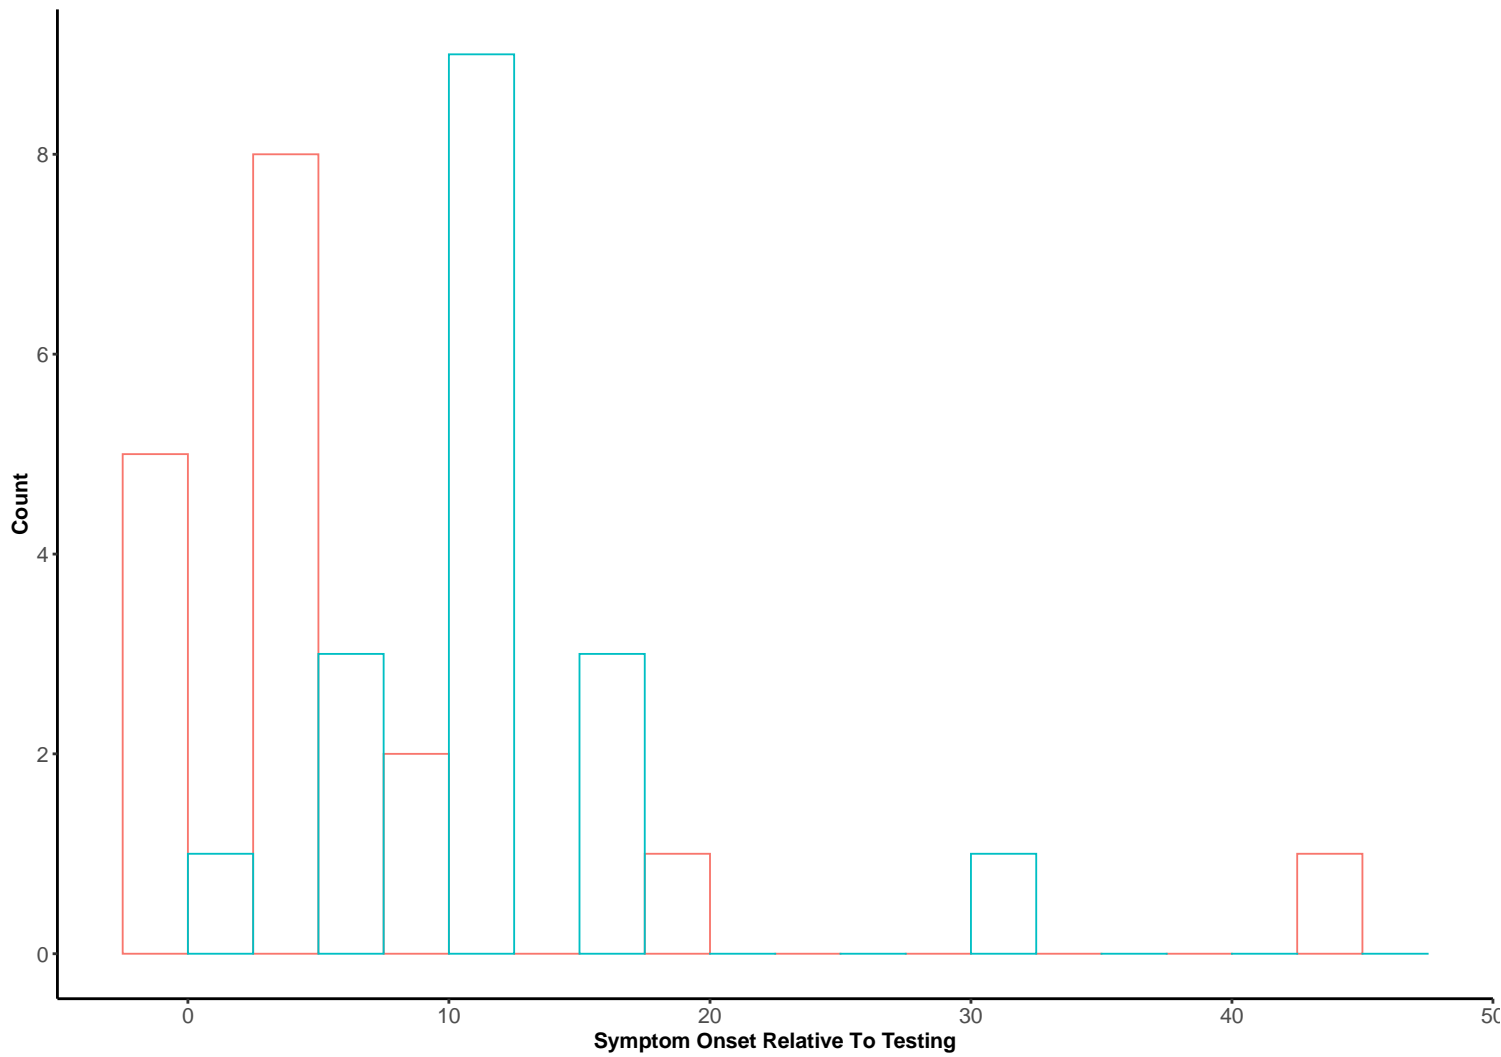

**Figure Legend. Histogram of symptom onset relative to nasopharyngeal (red) and stool (blue) testing (n=17).** Median [range] days between symptom onset and nasopharyngeal and stool RT-PCR testing was 7 [1-43] days and 11 [3-29] days respectively.

## Supplementary Figure 2

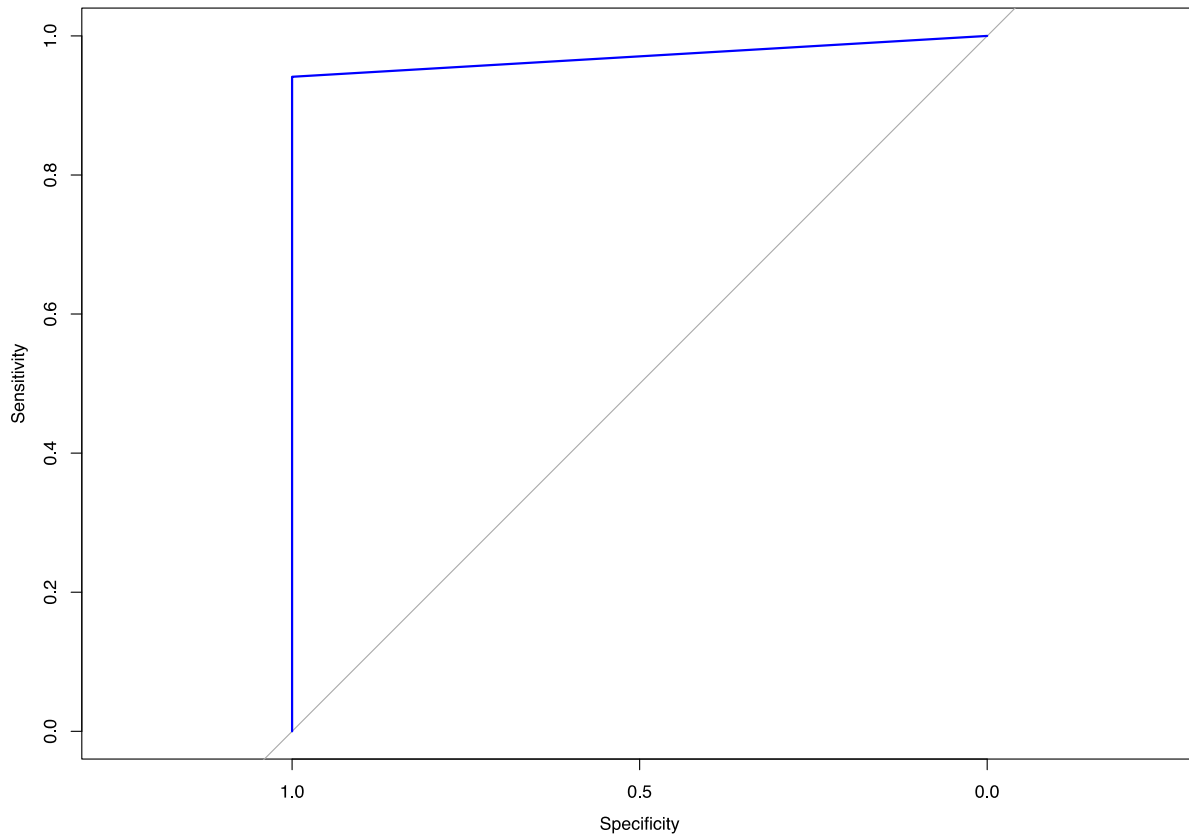

**Figure Legend. Receiver Operating Characteristic curve.** The performance of stool RT-PCR compared to NP RT-PCR was compared using a receiver operating characteristic curve (ROC) analysis. The area under the ROC curve (AUC) was determined to be 0.971

### Supplementary Figure 3

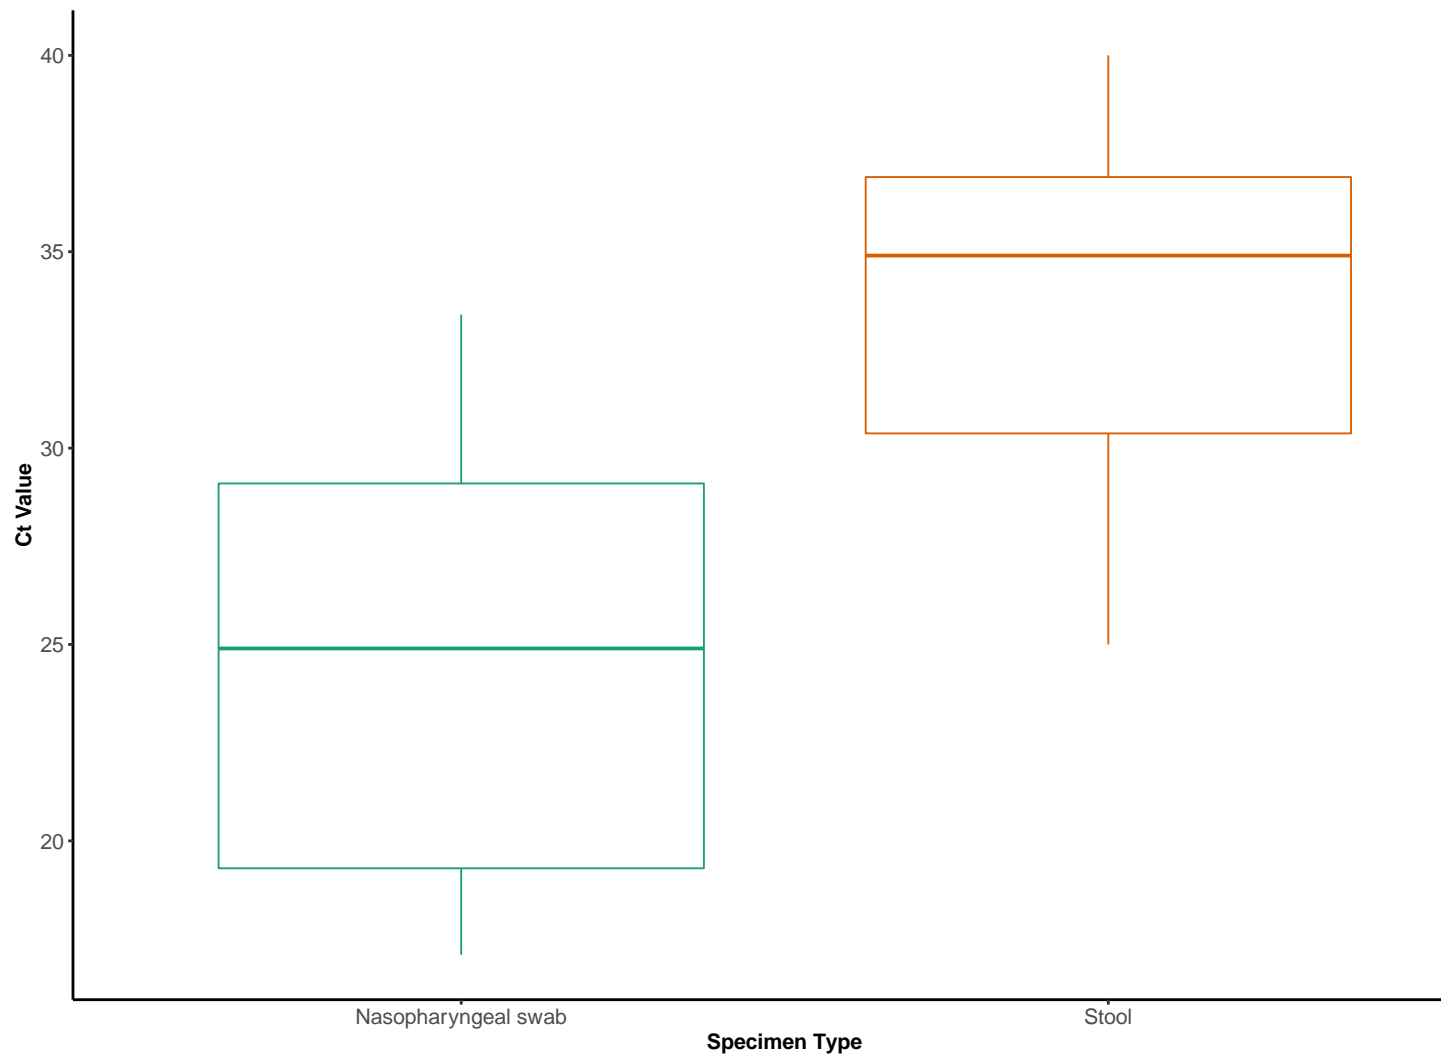

**Figure Legend. Box plot of nasopharyngeal swab  $C_T$  values (n=17) and stool  $C_T$  values (n=16).** Median stool  $C_T$  value was significantly higher than median nasopharyngeal swab  $C_T$  value (34.9 [6.5] vs. 24.9 [9.8];  $p$  value <0.001)

### Supplementary Figure 4

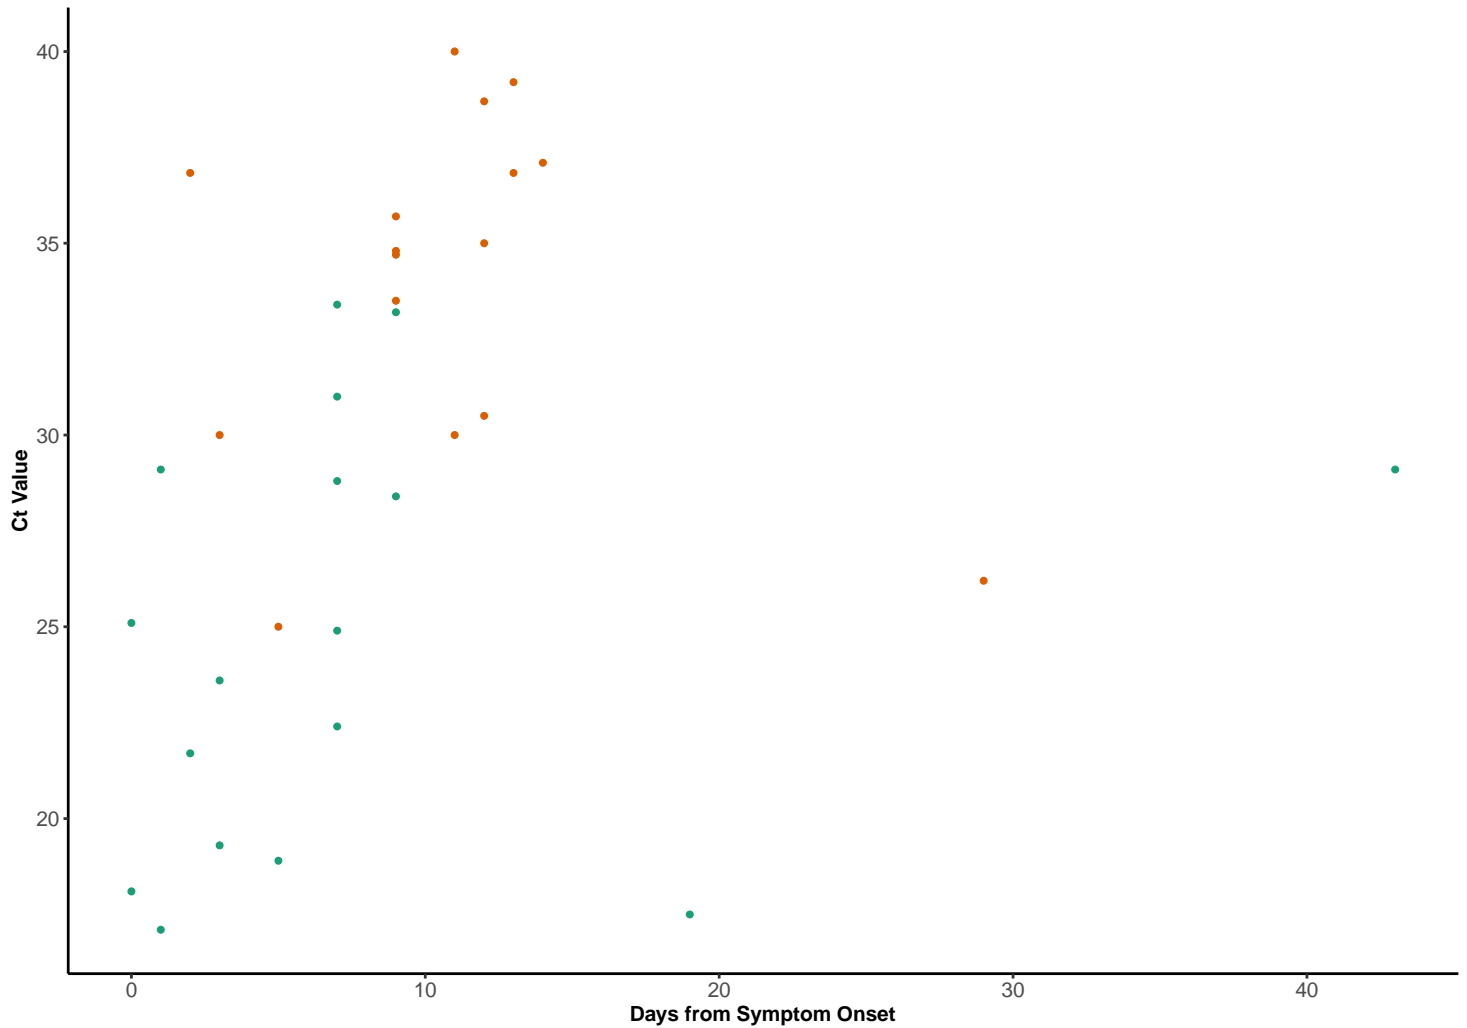

**Figure Legend.** Scatter plot of nasopharyngeal swab (green)  $C_T$  values ( $n=17$ ) and stool (red)  $C_T$  values ( $n=16$ ) by day of testing relative to symptom onset. Median stool  $C_T$  value was significantly higher than median nasopharyngeal swab  $C_T$  value (34.9 [6.5] vs. 24.9 [9.8];  $p$  value  $<0.001$ ). Median [range] days between symptom onset and nasopharyngeal and stool RT-PCR testing was 7 [1-43] days and 11 [3-29] days respectively.



Supplementary Figure 4

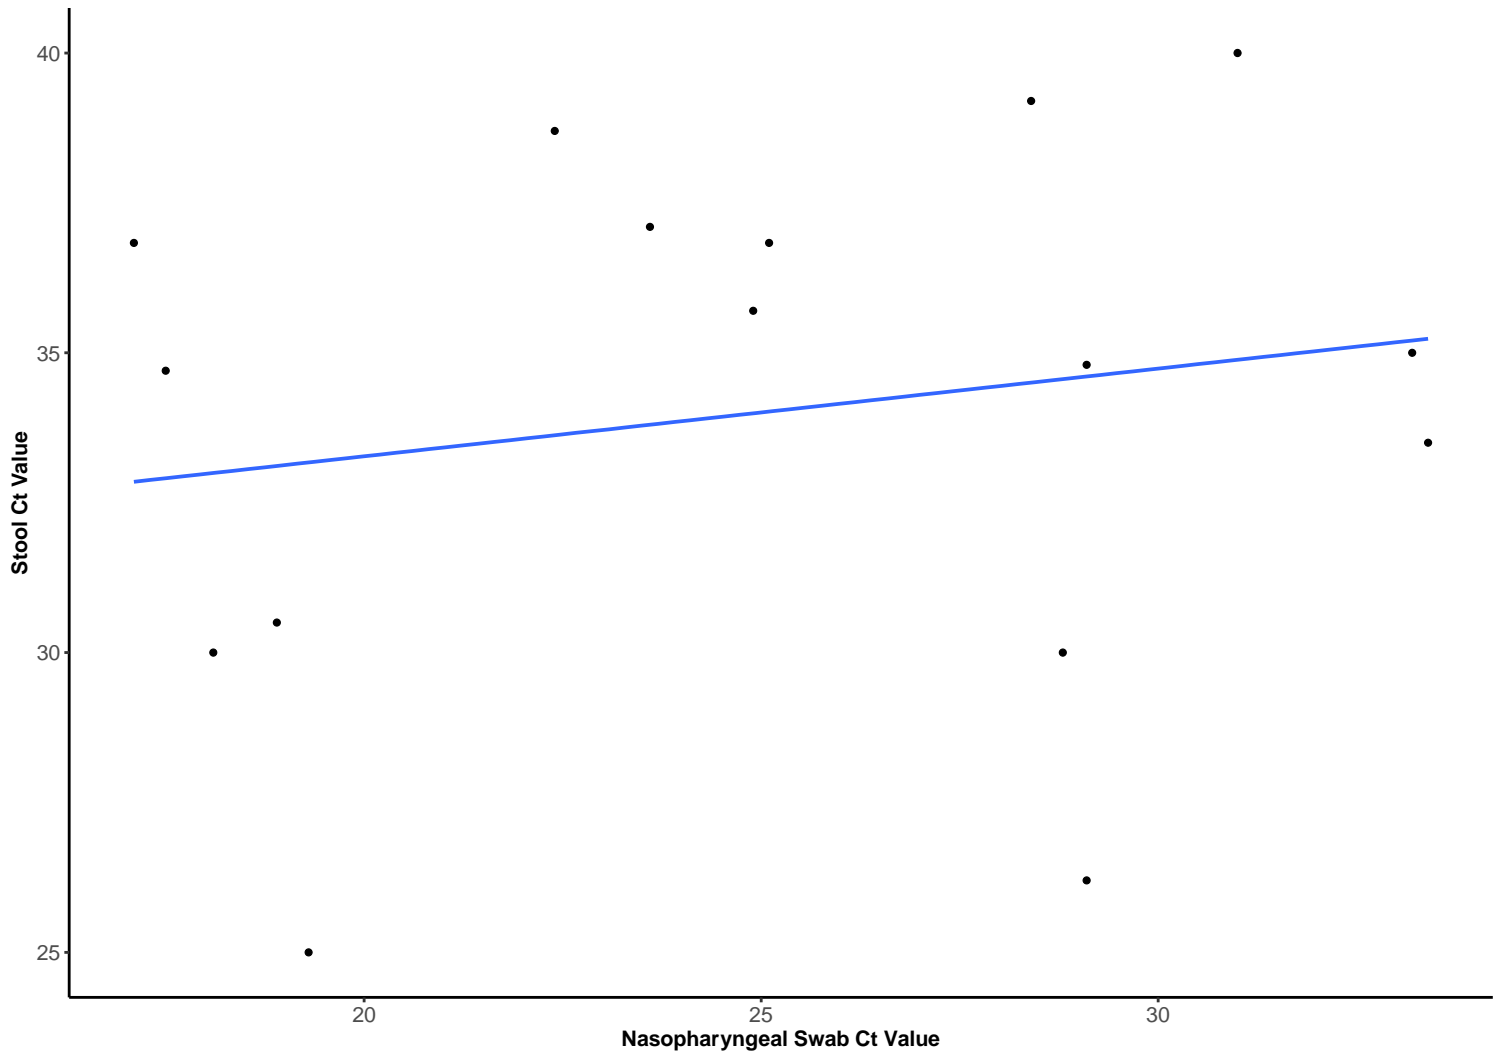

**Figure Legend. Correlation of  $C_T$  values for stool and nasopharyngeal SARS-CoV-2 RT-PCR assays, (n=16).** Nasopharyngeal swab  $C_T$  values are plotted versus stool  $C_T$ . Stool  $C_T$  values did not correlate with NP  $C_T$  values ( $R^2$ : -0.04,  $p$  value = 0.50)

## References

1. Babiker A, Myers CW, Hill CE, et al. SARS-CoV-2 Testing. *Am J Clin Pathol* 2020;153:706-708.
2. Lu X, Wang L, Sakthivel SK, et al. US CDC Real-Time Reverse Transcription PCR Panel for Detection of Severe Acute Respiratory Syndrome Coronavirus 2. *Emerg Infect Dis* 2020;26:1654-65.
3. Centers for Disease Control and Prevention. CDC 2019-Novel Coronavirus (2019-nCoV) Real-Time RT-PCR Diagnostic Panel. CDC/DDID/NCIRD/ Division of Viral Diseases, 2020.
